# Supplementary material
Source: PubMed Central journal article supplement (PMC3487542)
Supplement: supp_2012.069922_2012_069922-Contributions.pdf [file supp_2012.069922_2012_069922-Contributions.pdf]

**Manuscript no. HAEMATOL/2012/069922 entitled “The diagnostic role of galactomannan during antifungal prophylaxis Comment on: “The role of antifungal treatment in hematology”“**

**Authors: Corrado Girmenia, Salvatore Perrone**

**Information about the contributions of each person named as having participated in the study**

**1) Guarantor(s)**, i.e., person(s) who is (are) responsible for the integrity of the work as a whole:

- Corrado Girmenia, Dipartimento di Ematologia, Oncologia, Anatomia Patologica e Medicina Rigenerativa, Azienda Policlinico Umberto I, Rome, Italy, e-mail: girmenia@bce.uniroma1.it
- Salvatore Perrone Dipartimento di Ematologia, Oncologia, Anatomia Patologica e Medicina Rigenerativa, Azienda Policlinico Umberto I, Rome, Italy; e-mail: spitalia85@hotmail.com

According to the International Committee of Medical Journal Editors (ICMJE) ([http://www.icmje.org/ethical\\_1author.html](http://www.icmje.org/ethical_1author.html)): “*Authorship credit should be based on: 1) substantial contributions to conception and design, acquisition of data, or analysis and interpretation of data; 2) drafting the article or revising it critically for important intellectual content; and 3) final approval of the version to be published. Authors should meet conditions 1, 2, and 3 ..... Acquisition of funding, collection of data, or general supervision of the research group alone does not constitute authorship*”.

The guarantors of this manuscript confirm that all persons designated as authors qualify for authorship, and that each author has participated sufficiently in the work to take public responsibility for appropriate portions of the content.

2) Authors who participated in the **conception of the study**: Corrado Girmenia and Salvatore Perrone

3) **Design & Methods**. The following authors were responsible for specific investigations :

- Corrado Girmenia and Salvatore Perrone were responsible for critical review of literature

4) **Results**. The following authors were responsible for specific portions of the results, including figures and tables :

- Corrado Girmenia and Salvatore Perrone were responsible for the analysis of the data in the text and in the table

5) **Writing the manuscript**. The following authors were responsible for writing the manuscript:

- Corrado Girmenia and Salvatore Perrone were responsible for writing the manuscript

6) **Contributors Listed in Acknowledgments**: no acknowledgment
